# Supplementary material for: One-pot hydrothermal synthesis of CuO with tunable morphologies on Ni foam as a hybrid electrode for sensing glucose
Source: Royal Society of Chemistry journal article supplement (doi:10.1039/c3ra47422d), 2014-01-01
Supplement: c3ra47422d1.pdf [file c3ra47422d1.pdf]

# **One-pot hydrothermal growth of three-dimensional CuO microflowers on Ni foam as hybrid electrode for sensing glucose**

Zengjie Fan <sup>a, b</sup>, Bin Liu<sup>c</sup>, Zhangpeng Li <sup>a</sup>, Limin Ma <sup>a</sup>, Jinqing Wang <sup>a\*</sup>, and Shengrong Yang <sup>a</sup>

<sup>a</sup> State Key Laboratory of Solid Lubrication, Lanzhou Institute of Chemical Physics, Chinese Academy of Sciences, Lanzhou 730000, P. R. China

<sup>b</sup> University of Chinese Academy of Sciences, Beijing 100080, P. R. China

<sup>c</sup> School of Stomatology, Lanzhou University, Lanzhou 730000, P. R. China

\* Corresponding author. Tel./Fax: +86 931 4968076.

E-mail address: jqwang@licp.cas.cn (J. Q. Wang)

Table S1. The reactive condition needed for the synthesis of CuO with different morphology.

| Morphology  | Size of Ni foam<br>(width ×length) | Cu(NO <sub>3</sub> ) <sub>2</sub> ·3H <sub>2</sub> O<br>(mM) | CO(NH <sub>2</sub> ) <sub>2</sub><br>(mM) |
|-------------|------------------------------------|--------------------------------------------------------------|-------------------------------------------|
| Microflower | 1.5 cm×3 cm                        | 2                                                            | 10                                        |
| Microurchin | 1.5 cm×3 cm                        | 0.2                                                          | 1                                         |
| Microsheet  | 1.5 cm×3 cm                        | 10                                                           | 50                                        |

Table S2. The surface area of CuO with different morphologies

| Different CuO morphology | BET surface area (m <sup>2</sup> /g) |
|--------------------------|--------------------------------------|
| Urchin-like              | 15.0082                              |
| Flower-like              | 18.5432                              |
| Sheet-like               | 1.1111                               |

Note: The reactive conditions of three CuO microstructures are consistent with the reactive conditions listed in Table S1 except for absence of Ni foam.

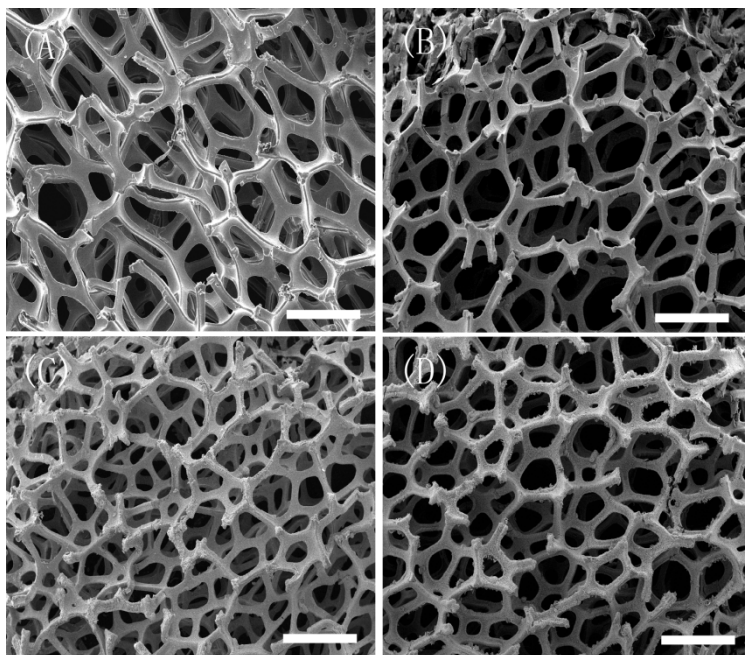

Fig. S1 SEM images of Ni foam, CuO microurchin/Ni foam, CuO microflower/Ni foam and CuO microsheel/Ni foam (scale bar=500  $\mu\text{m}$ ).

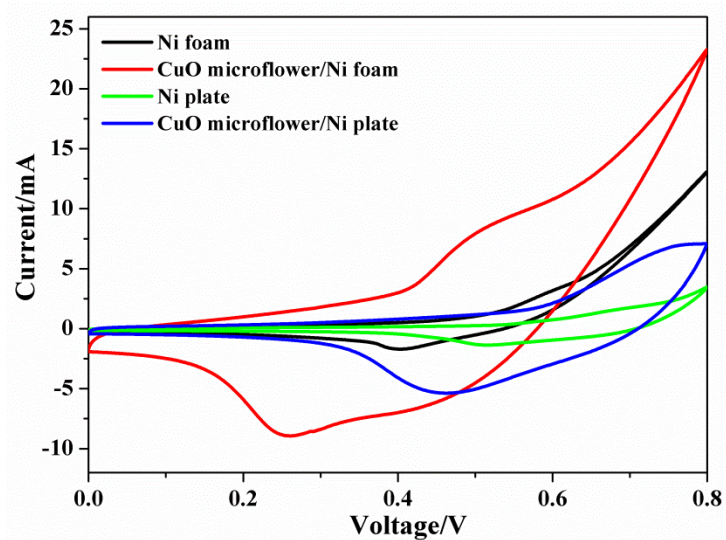

Fig. S2 CVs of Ni foam electrode, CuO microflower/Ni foam, flat Ni plate and CuO microflower/Ni plate in 0.1 M NaOH solution.

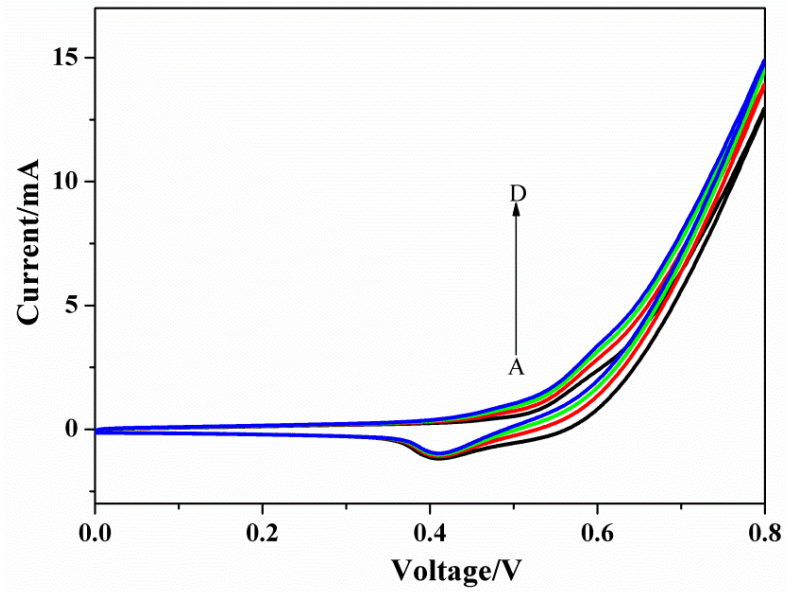

Fig. S3 CV curves of Ni foam electrode in 0.1 M NaOH solution containing 0.2, 0.4, 0.6 mM glucose, respectively.

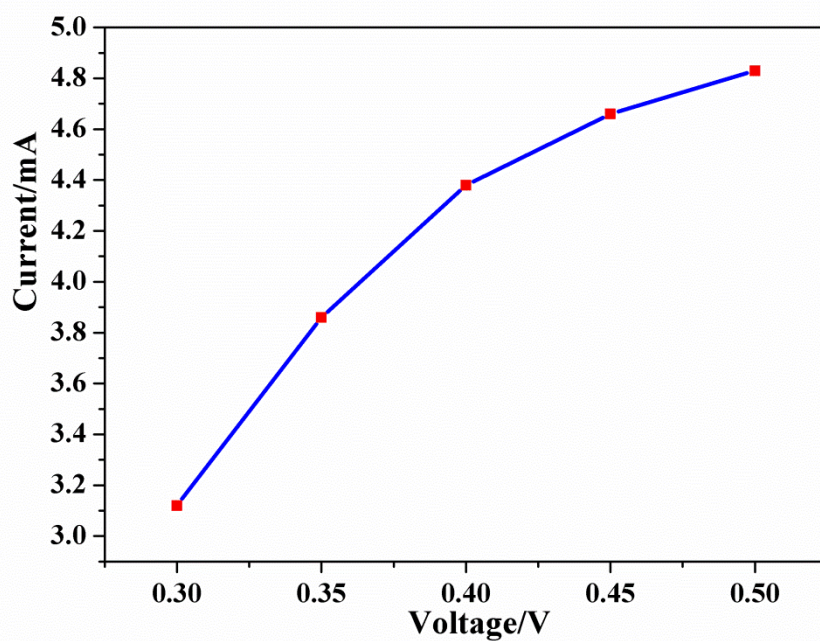

Fig. S4 Effect of potential on amperometric response at the hybrid electrode of CuO microflower/Ni foam.

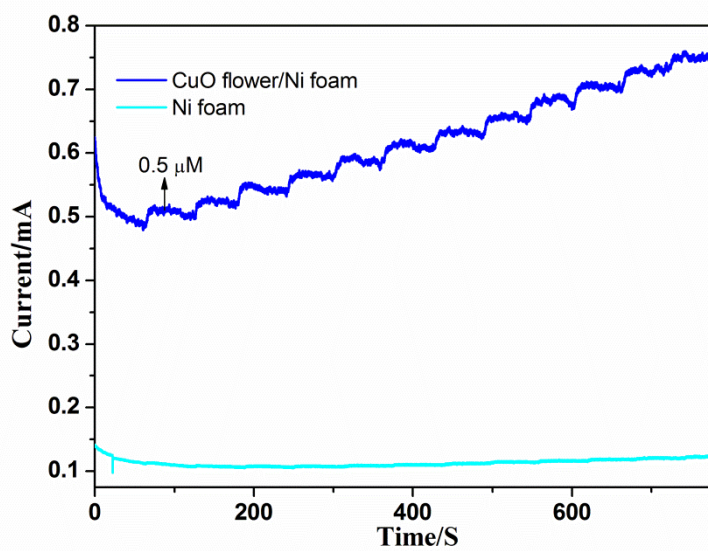

Fig. S5 Amperometric response of Ni foam electrode and CuO microflower/Ni foam electrode to 0.5-6  $\mu\text{M}$  glucose in 0.1 M NaOH solution.

The calculation method of electroactive surface area of electrode:

The electroactive surface area of electrode was calculated according to the following Randles-Sevcik equation<sup>[1]</sup>, and the corresponding calculation procedure is shown as follows:

$$I_p = 2.69 \times 10^5 AD^{1/2} n^{2/3} \gamma^{1/2} C$$

where  $n$  is the number of electrons participating in the redox reaction,  $A$  is the area of the electrode ( $\text{cm}^2$ ),  $D$  is the diffusion coefficient of the molecule in solution ( $\text{cm}^2 \cdot \text{s}^{-1}$ ),  $C$  is the concentration of the probe molecule in the bulk solution ( $\text{mol} \cdot \text{cm}^{-3}$ ), and  $\gamma$  is the scan rate of the potential perturbation ( $\text{V} \cdot \text{s}^{-1}$ ). In this study, 20 mM  $\text{Fe}(\text{CN})_6^{4-/3-}$  redox system was used as electrolyte for cyclic voltammetry measurement. In this system,  $n$  is 1, and  $D$  is  $6.7 \times 10^{-6} \text{cm}^2 \cdot \text{s}^{-1}$ . In the cyclic voltammetry test, the scan rate of the potential perturbation is  $20 \text{mVs}^{-1}$ , and the value of peak current obtained from the cyclic voltammograms is 3.23 mA. The relevant values were substituted into Randles-Sevcik equation, after that the electroactive surface area of electrode ( $1.65 \text{cm}^2$ ) can be obtained.

Reference:

[1] S. Hrapovic, Y. Liu, K. B. Male, J. H. T. Luong, Anal. Chem. 2004, 76, 1083-1088.

**Table S3.** The performance comparison between CuNWs/GTE and the other reported glucose sensors.

| Electrode                                          | Detection limit<br>( $\mu\text{M}$ ) | Sensitivity<br>( $\mu\text{A}\text{mM}^{-1}\text{cm}^{-2}$ ) | Linear range               | Reference |
|----------------------------------------------------|--------------------------------------|--------------------------------------------------------------|----------------------------|-----------|
| CuO flowers/Ni foam                                | 0.16                                 | 1084                                                         | 0.5 $\mu\text{M}$ -3.5 mM  | This work |
| CuO nanospheres/glass carbon electrode             | 1                                    | 404                                                          | Up to 2.6 mM               | 33        |
| CuO nanofibers /glass carbon electrode             | 0.8                                  | 431                                                          | 6 $\mu\text{M}$ -2.5 mM    | 34        |
| CuO nanocubes/graphene                             | 0.7                                  | 1360                                                         | 2 $\mu\text{M}$ -4 mM      | 35        |
| CuO nanoparticles / single-walled carbon nanotubes | 0.05                                 | 1610                                                         | 0.05 $\mu\text{M}$ -1.8 mM | 2         |
| NiO nanoparticles/ single-walled carbon nanotubes  | 0.3                                  | 907                                                          | 1 $\mu\text{M}$ -1 mM      | 36        |
| Cu nanoparticles/ multi-walled carbon nanotubes    | 2                                    | 992                                                          | 0.5 mM-1 mM                | 37        |

**Table S4.** Amperometric determination of glucose in human blood serum samples.

| Sample | Concentration<br>(mM) | Added<br>(mM) | Found<br>(mM) | RSD <sup>a</sup> (%) | Recovery<br>(%) |
|--------|-----------------------|---------------|---------------|----------------------|-----------------|
| 1      | 4.6                   | 0.5           | 4.9           | 3.3                  | 96              |
| 2      | 5.3                   | 0.5           | 5.4           | 2.8                  | 92              |
| 3      | 6.8                   | 0.5           | 7.4           | 3.5                  | 101             |
| 4      | 11.5                  | 0.5           | 12.7          | 4.2                  | 106             |

<sup>a</sup> RSD (%) calculated from three repetitive trials.
